# Supplementary material for: Performance of ultrafine silver chromate particles in electrochemical capacitors for low-pass frequency filtering applications
Source: Royal Society of Chemistry journal article supplement (doi:10.1039/d5na00843c), 2025-12-01

## Supporting Information

Performance of ultrafine silver chromate particles in electrochemical capacitor for low-pass frequency filtering application

**Figure S1:** X-ray diffraction analysis of the  $\text{Ag}_2\text{CrO}_4$ -modified electrode after 2000 galvanostatic charge-discharge cycles.

**Figure S1**

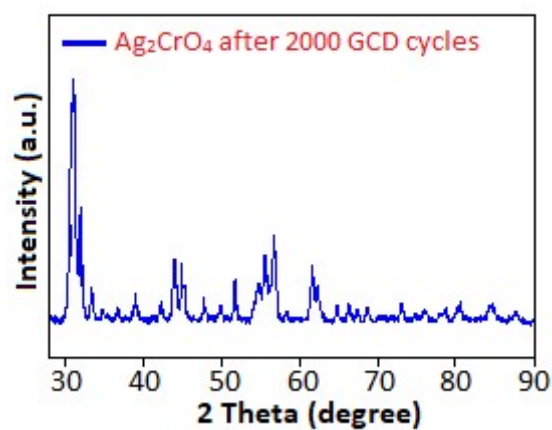

Supplement: d5na00843c1.pdf [file d5na00843c1.pdf]
